# Supplementary material for: Predictive Blood-Based Biomarkers in Patients with Epithelial Ovarian Cancer Treated with Carboplatin and Paclitaxel with or without Bevacizumab: Results from GOG-0218
Source: Oxford University Press journal article supplement (doi:10.1158/1078-0432.ccr-19-0226), 2020-01-09
Supplement: 10780432ccr190226-sup-215721_3_supp_5898304_q0wxds.docx [file 10780432ccr190226-sup-215721_3_supp_5898304_q0wxds.docx]

S2. Association between outcomes (PFS and OS) and baseline covariates (age, stage/debulking status, and performance status). CI is 95% confidence interval.

|  | ***PFS*** | | ***OS*** | |
| --- | --- | --- | --- | --- |
| ***Baseline Covariates*** | ***HR (CI)*** | ***p-value*** | ***HR (CI)*** | ***p-value*** |
| ***Age*** | 1.01  (0.99, 1.01) | 0.068 | 1.01  (1.00,1.02) | 4.14e-3 |
| ***Stage/Debulking***  ***Status*** | 1.22  (1.11, 1.34) | 2.67e-5 | 1.18  (1.07, 1.32) | 1.78e-3 |
| ***GOG Performance***  ***Status*** | 1.22  (1.07, 1.38) | 2.21e-3 | 1.28  (1.12, 1.48) | 4.61e-4 |
